# Supplementary material
Source: PubMed Central journal article supplement (PMC5037275)
Supplement: cmi201539x1.pdf [file cmi201539x1.pdf]

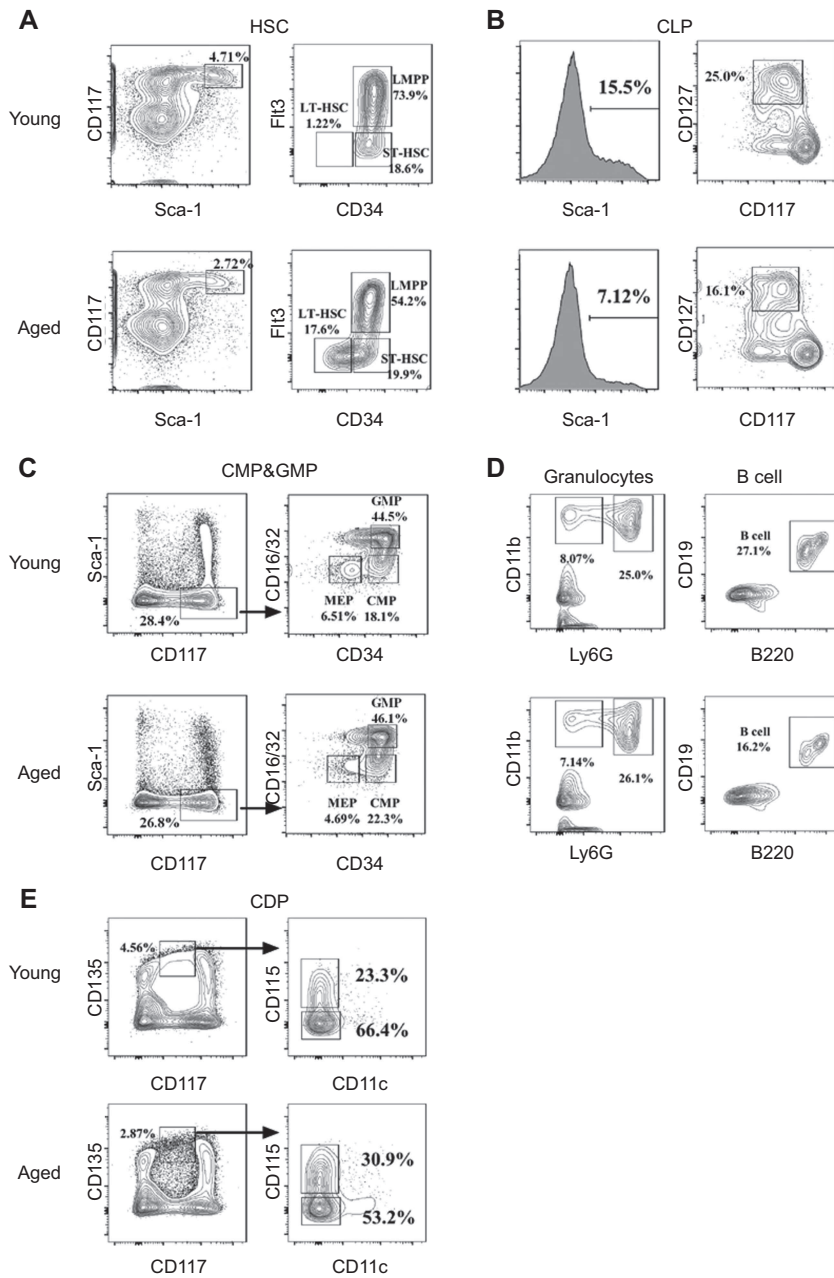

**Supplemental Figure 1** FACS analysis of hematopoietic cells in young and aged mice. **(A–C, E)** Lin<sup>−</sup> cells enriched from the BM of young and aged mice were analyzed by flow cytometry. The FACS plots show the percentages of HSC **(A)**, CLP **(B)**, CMP, GMP **(C)**, and CDP **(E)** in the BM of young and aged mice. **(B)** The FACS plots show the percentages of B cells and granulocytes in the BM of young and aged mice.

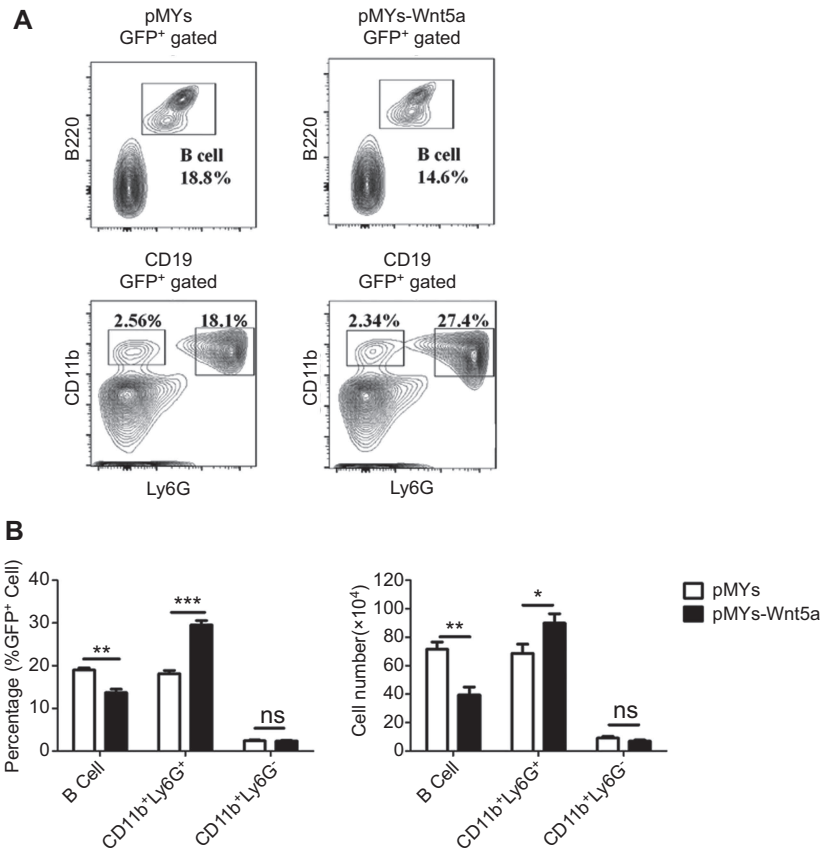

**Supplemental Figure 2** A decreased number of B cells and increased number of CD11b<sup>+</sup>Ly6G<sup>+</sup> myeloid cells were found in the BM of Wnt5a-overexpressing mice. Lin<sup>-</sup> CD45.2 BM cells were retrovirally transduced with the control or Wnt5a overexpression plasmid. A total of  $1 \times 10^5$  sorted Lin<sup>-</sup> GFP<sup>+</sup> CD45.2 BM cells in combination with  $1 \times 10^5$  untreated CD45.1 BM cells were transplanted into lethally irradiated CD45.1 recipient mice. Six weeks later, the percentages (**A**) and numbers (**B**) of CD45.2 donor-derived CD19<sup>+</sup>B220<sup>+</sup> B cells and CD11b<sup>+</sup>Ly6G<sup>-</sup> and CD11b<sup>+</sup>Ly6G<sup>+</sup> myeloid cells in the BM of chimeric mice were analyzed by flow cytometer. Data are representative of three independent experiments. Error bars represent SEM (\* $P < 0.05$ , \*\* $P < 0.01$ , \*\*\* $P < 0.001$ ).

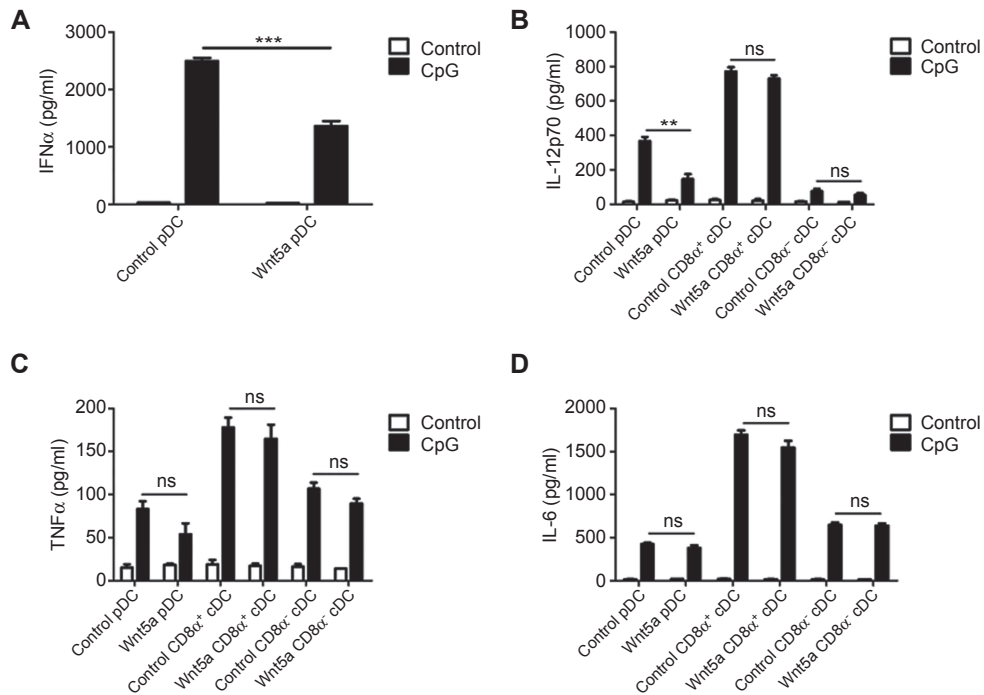

**Supplemental Figure 3** Wnt5a negatively regulated the production of IFN- $\alpha$  and IL12p70 by pDC. Sorted pDC, CD172a $^-$ CD8 $\alpha^+$ , and CD172a $^+$ CD8 $\alpha^-$ cDC were cultured in 96-well plates, pretreated with or without 200 ng/mL Wnt5a for 2 hours and then stimulated with 5  $\mu$ M CpG (ODN2216) for 48 hours. The production of IFN- $\alpha$  (**A**) in pDC, and IL12p70 (**B**), TNF $\alpha$  (**C**), and IL-6 (**D**) in pDC and cDC were analyzed. Data are representative of two independent experiments. Error bars represent SEM (\* $P < 0.05$ , \*\* $P < 0.01$ ).

**Supplementary Table 1 Primers for RT-PCR**

| Genes          | Forward (5'-3')        | Reverse (5'-3')          |
|----------------|------------------------|--------------------------|
| Ikaros         | CGCCAAACGAGACAAGTG     | CAGCCCCAGGTAGTTG         |
| Myc            | CTGAAGAAGAGCAAGAAGATGA | GACGTGGCACCTCTTGAG       |
| Notch1         | CAGAACAACAAGGAGGAGACT  | GCAATCGGTCCATGTGAT       |
| Notch2         | GCAGGACAATAAGGAAGAGAC  | GGCTGGGAGTCAGTTATA       |
| PU.1           | AGCCATAGCGATCACTACTG   | TCTGTTCCAGCTCCATGTG      |
| Gfi-1          | TCATCCACACAGGTGAGAAG   | CTTCCCACACAGGTCACAG      |
| Bcl11a         | GCCAGAGGATGACGATTG     | TGTGCAGACCGAGGAGAG       |
| Flt3           | CAGAAGAAGCGATGTATCAGA  | TCTTTCTCCGTGAATCTTCA     |
| IL-7R          | CAAAAACGAGTCTGAATGTGA  | GTGTCCCTGTGTCTCCAAC      |
| $\beta$ -actin | ATGCTCCCCGGGCTGTAT     | CATAGGAGTCCTTCTGACCCATTC |
